# Supplementary material for: Design of Fe and N co-decorated biomass-derived hierarchical porous carbon frameworks with boosted oxidase-like activity for hydroquinone detection
Source: Royal Society of Chemistry journal article supplement (doi:10.1039/d4nj00509k), 2024-01-01
Supplement: d4nj00509k1.pdf [file d4nj00509k1.pdf]

# Electronic Supplementary Information

## Design of Fe and N co-decorated Biomass-derived Hierarchical Porous Carbon Frameworks with Boosted Oxidase-like Activity for Hydroquinone Detection

Han Zhang, Xiaodan Qi, Zhifei Wang, Lihua Jin\* and Yehua Shen\*

Key Laboratory of Synthetic and Natural Functional Molecule Chemistry of the Ministry of Education, College of Chemistry & Materials Science, Northwest University, Xi'an 710069, People's Republic of China

### 1. Apparatus

The transmission electron microscopy (TEM) was carried out in Talos F200X (Thermo Fisher). The X-ray photoelectron spectroscopy (XPS) spectrum was performed on an Axis Ultra X-ray photoelectron spectrometer (Kratos, UK). The X-ray powder diffraction spectrum (XRD) was performed on the D8 Advance X-ray powder analyzer (Bruker, USA). The N<sub>2</sub> adsorption-desorption with Brunauer Emmett-Teller (BET, ASAP 2460) method and the pore size distributions were measured by the Barrett-Joyner-Halenda (BJH). Electron paramagnetic resonance (EPR) spectroscopy was obtained on Bruker E500-9.5/12. The scanning electron microscope (SEM, Zeiss Sigma) was used to observe the surface morphology of the catalysts. A UV-2550 spectrophotometer (Shimadzu, Japan) was used to record the changes of UV-vis spectrum signal.

### 2. Optimization experiments and Steady-state dynamics experiments

The effect of pH on the catalytic activity of Fe-N-C composites was obtained in different pH (2, 3, 4, 4.8, 5, 6, 7) of 0.2 M NaAc-HAc buffer solutions. The effect of temperature on the catalytic activity of Fe-N-C composites were carried out at 20°C,

---

\*To whom correspondence should be addressed. Fax: +86-029-88302635. E-mail: [jinlihua@nwu.edu.cn](mailto:jinlihua@nwu.edu.cn).

\*To whom correspondence should be addressed. Fax: +86-029-88302635. E-mail: [yhshen@nwu.edu.cn](mailto:yhshen@nwu.edu.cn).

25°C, 30°C, 37°C, 40°C, 45°C, 50°C and 60°C, respectively. The influence of reaction time on the catalytic activity of Fe-N-C composites was recorded at 0 min, 5 min, 10 min, 15 min, 20 min, 25 min, 30 min. The effect of material concentration on the catalytic activity of Fe-N-C composites was investigated from 2.5 to 20 µg/mL, and the effect of TMB concentration was varied from 0.1 to 1.0 mM. The absorbance values at 652 nm were recorded. Steady-state kinetic experiments were performed according previous reports in NaAc-HAc buffer (0.2 M, pH 4.0) consisting of 15 µg/mL Fe-N-C composite and different concentrations of TMB at 30°C. All measurements were parallel performed three times, and the values were averaged. The experiment processes are described in detail in the supplementary material.

### 3. Figure and Table

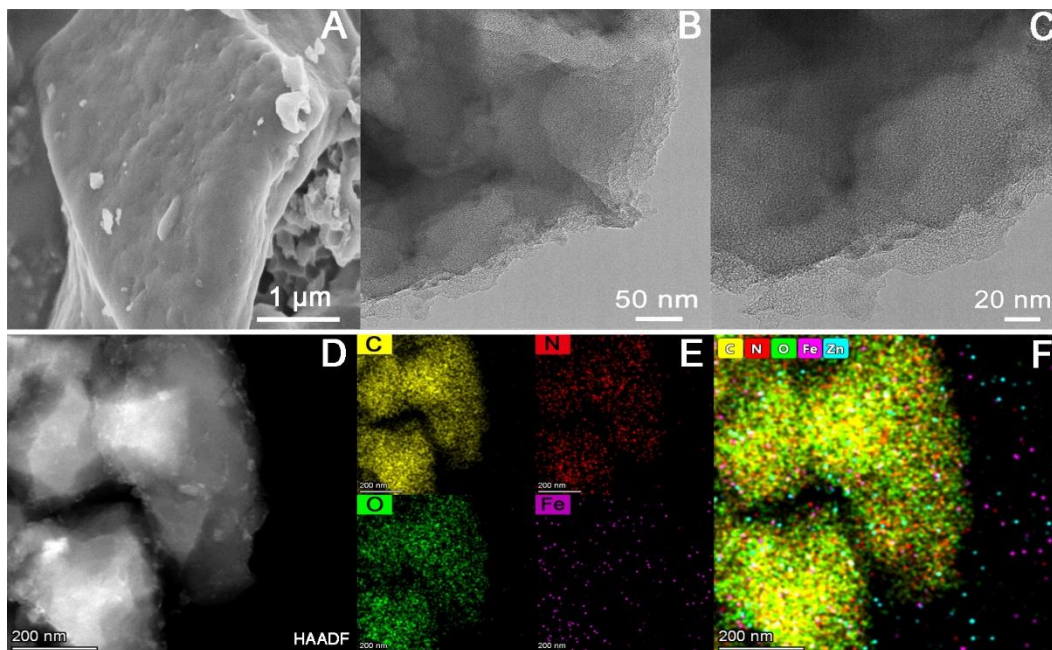

**Figure S1.** SEM image (A) and TEM image of the prepared Fe-C (B-C); EDS element mapping spectra (D-F) of the prepared Fe-C.

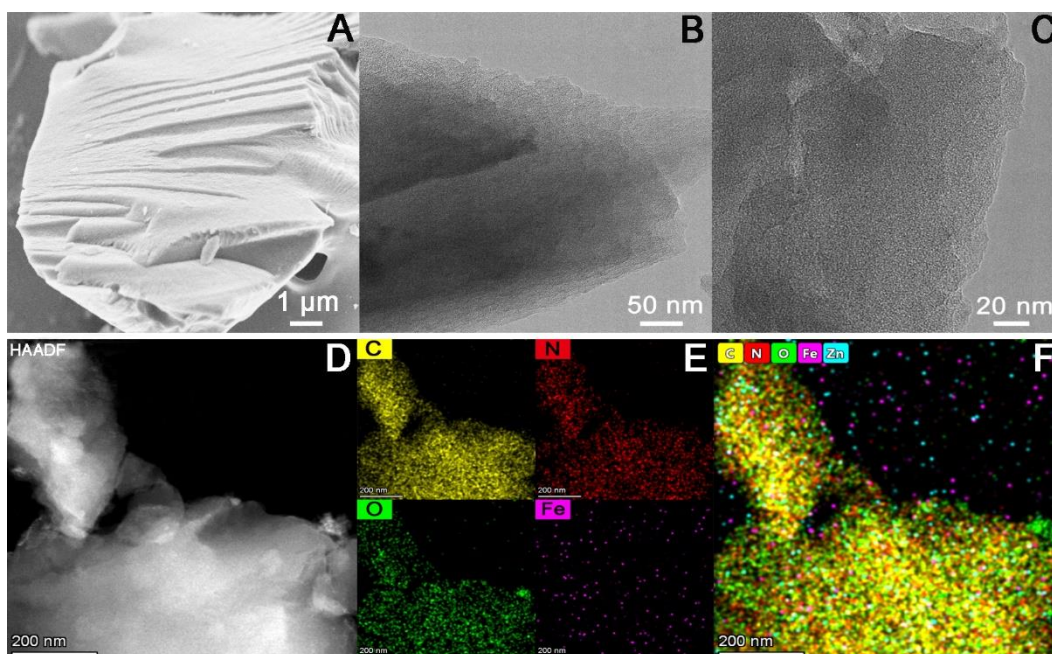

**Figure S2.** SEM image (A) and TEM image of the prepared N-C (B-C); EDS element mapping spectra (D-F) of the prepared N-C.

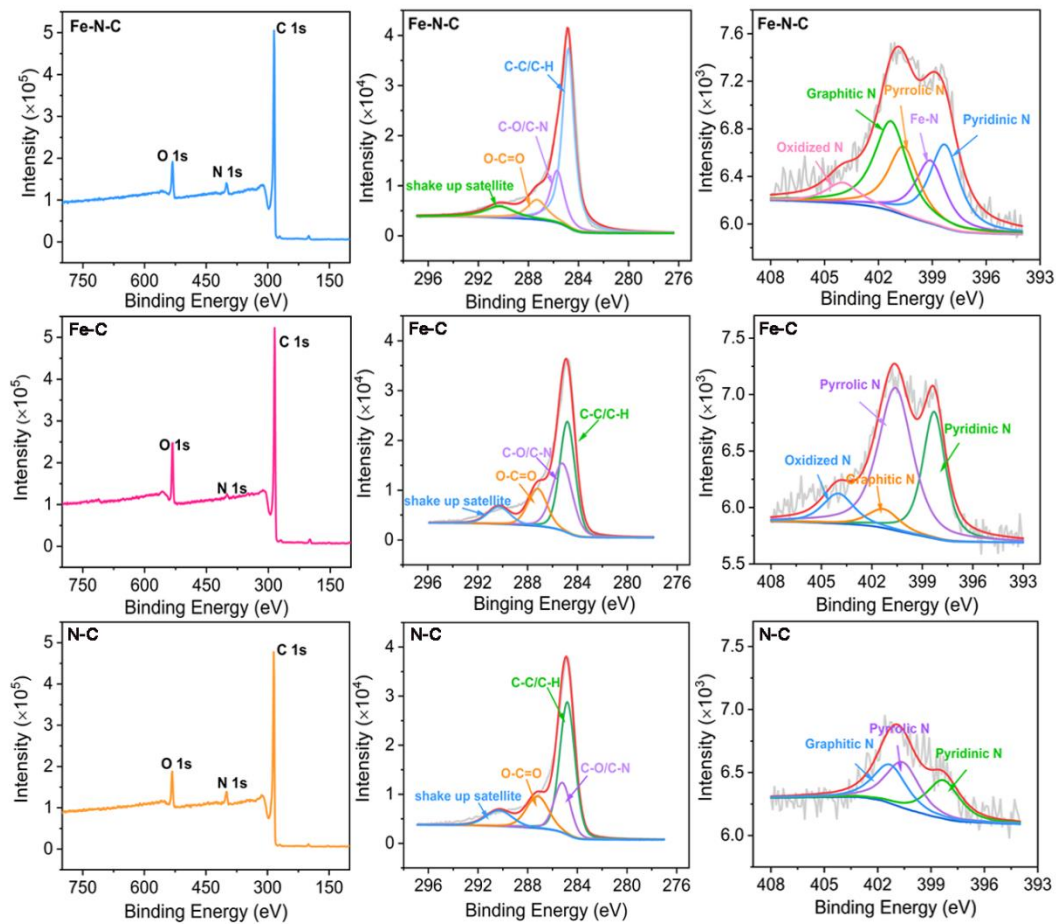

**Figure S3.** XPS spectra of (A)Fe-N-C, (D)Fe-C and (G)N-C; High resolution C1s spectra of (B)Fe-N-C, (E)Fe-C and (H)N-C; High resolution N1s spectra of (C)Fe-N-C, (F)Fe-C and (I)N-C.

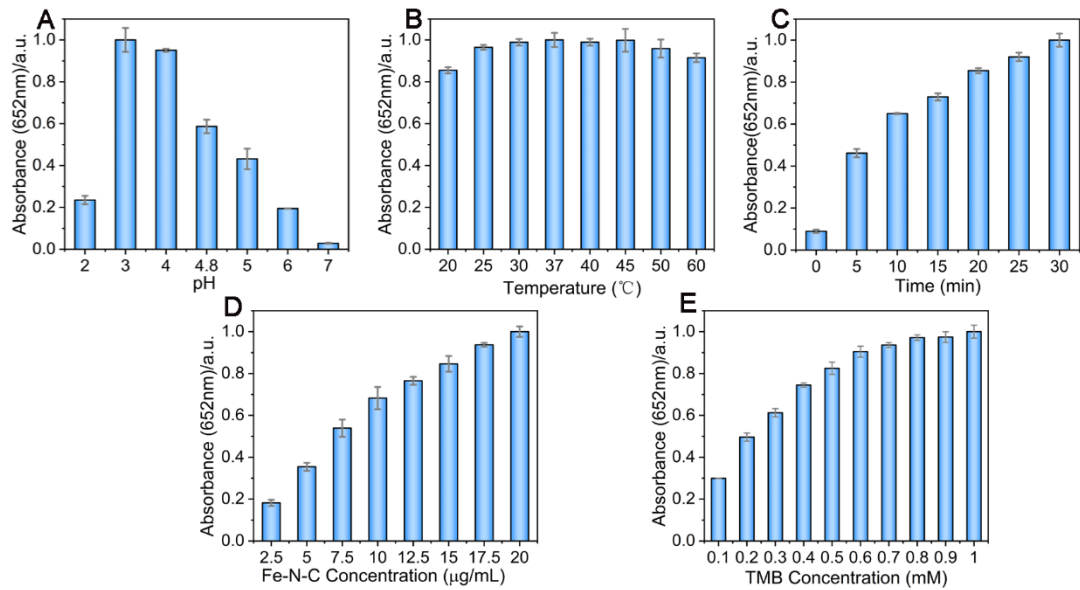

**Figure S4** The effects of reaction condition on the oxidase-like activity of Fe-N-C nanozyme (A) pH, (B) temperature, (C) reaction time, (D) the concentration of Fe-N-C, (E) the concentration of TMB.

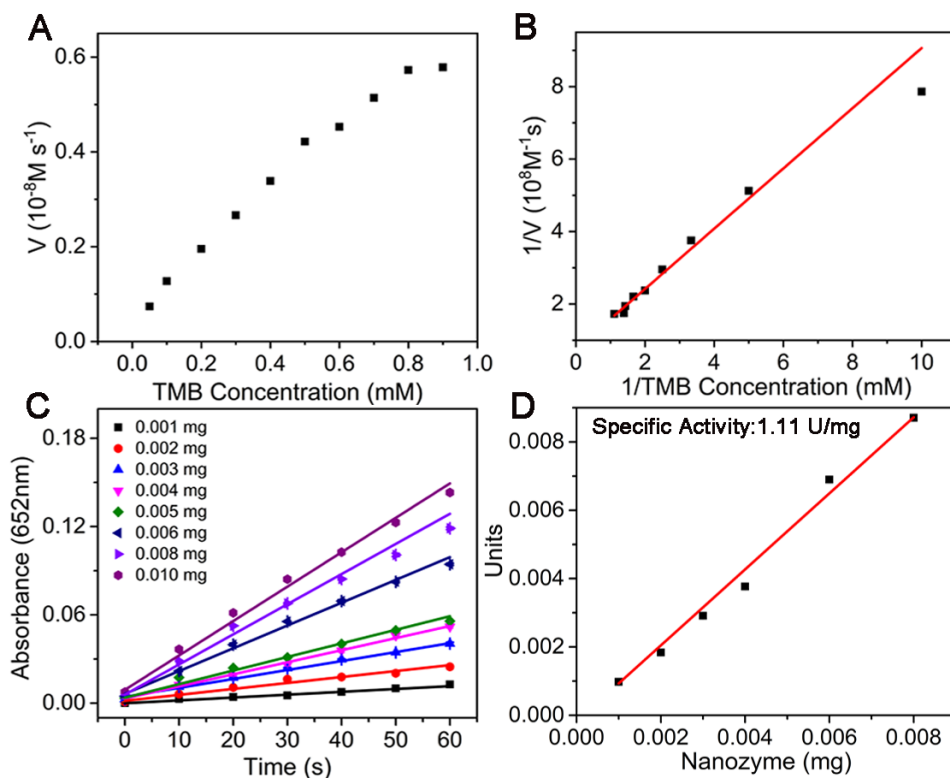

**Figure S5.** Steady-state kinetic assay of Fe-N-C nanozyme: (A) the trend graph of the initial rate with the TMB concentration; (B) the double reciprocal curve; (C) Absorbance-time curve of TMB colorimetric reaction catalyzed by the Fe-N-C with different amount; (D) Relationship between the enzyme-like activity of the Fe-N-C amount.

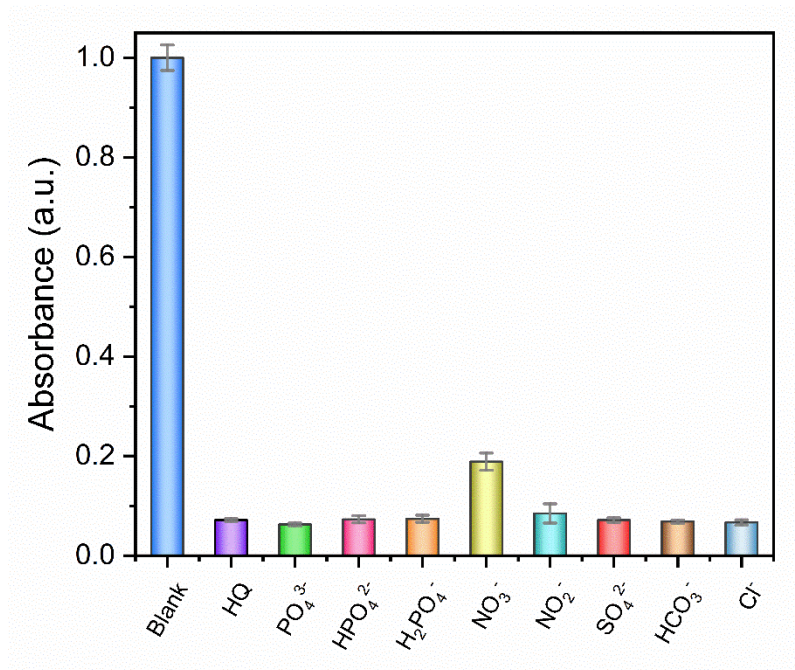

**Figure S6.** Effect of possible interference ions to the detection system

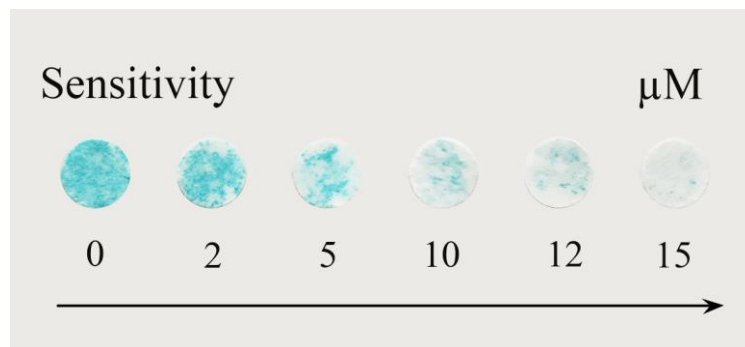

**Figure S7.** Responses of the color of the Fe-N-C nanozyme test paper to HQ concentration

**Table S1.** The SSA, porosity parameters and average particle size of Fe-N-C, Fe-C and N-C.

| Catalyst | BET<br>(m <sup>2</sup> /g) | Total pore volume<br>V <sub>total</sub> (cm <sup>3</sup> /g) | micropore volume<br>V <sub>mic</sub> (cm <sup>3</sup> /g) | V <sub>mic</sub> / V <sub>total</sub><br>(%) | Average Pore<br>size (nm) |
|----------|----------------------------|--------------------------------------------------------------|-----------------------------------------------------------|----------------------------------------------|---------------------------|
| N-C      | 824.93                     | 0.44                                                         | 0.32                                                      | 72.72                                        | 2.15                      |
| Fe-C     | 1709.95                    | 0.91                                                         | 0.21                                                      | 23.08                                        | 2.13                      |
| Fe-N-C   | 1077.81                    | 0.58                                                         | 0.35                                                      | 60.34                                        | 2.15                      |

**Table S2.** Comparison of Fe-N-C based system with other reported HQ sensors.

| Materials                                          | Methods          | Linear range  | LOD       | Ref.      |
|----------------------------------------------------|------------------|---------------|-----------|-----------|
| Ce-MOF/carbon<br>nanotube composite                | Electrochemistry | 10 - 100 μM   | 5.3 μM    | [1]       |
| g-CNQDs                                            | Fluorometry      | 0.5 - 11.6 μM | 0.04 μM   | [2]       |
| Si nanoparticles                                   | Fluorometry      | 2.5 - 27 μM   | 0.68 μM   | [3]       |
| NiCo <sub>2</sub> O <sub>4</sub> @MnO <sub>2</sub> | Colorimetry      | 0 - 24 μM     | 0.042 μM  | [4]       |
| P-FM JMMs                                          | Colorimetry      | 0 - 100 μM    | 0.0923 μM | [5]       |
| ZIF-8@MnO <sub>2</sub>                             | Colorimetry      | 0.1 - 15 μM   | 0.1 μM    | [6]       |
| Au/CuO                                             | Colorimetry      | 5 - 200 μM    | 3 μM      | [7]       |
| Ni-MOF@NiV                                         | Colorimetry      | 0.5-70 μM     | 0.37      | [8]       |
| Fe-C-N                                             | Colorimetry      | 0.5 - 12 μM   | 0.09 μM   | This work |



## Reference

- [1] H. Huang, Y. Chen, Z. Chen, J. Chen, Y. Hu, J.-J. Zhu, Electrochemical sensor based on Ce-MOF/carbon nanotube composite for the simultaneous discrimination of hydroquinone and catechol, *J. Hazard. Mater.* 416 (2021).
- [2] J. Chen, Y. Gao, X. Hu, Y. Xu, X. Lu, Detection of hydroquinone with a novel fluorescence probe based on the enzymatic reaction of graphite phase carbon nitride quantum dots, *Talanta* 194 (2019) 493-500.
- [3] X. Yuan, B. Wang, C. Yan, W. Lv, Q. Ma, B. Zheng, J. Du, D. Xiao, A rapid and simple strategy for discrimination and detection of catechol and hydroquinone by fluorescent silicon nanoparticles, *Microchem. J.* 158 (2020).
- [4] Y. Ma, M. Zhu, Q. He, M. Zhao, H. Cui, Photoenhanced Oxidase-Peroxidase-like NiCo<sub>2</sub>O<sub>4</sub>@MnO<sub>2</sub> Nanozymes for Colorimetric Detection of Hydroquinone, *Acs Sustainable Chemistry & Engineering* 10(17) (2022) 5651-5658.
- [5] X. Zhang, B. Liu, T. Wei, Z. Liu, J. Li, Self-propelled Janus magnetic micromotors as peroxidase-like nanozyme for colorimetric detection and removal of hydroquinone, *Environmental Science-Nano* 10(2) (2023) 476-488.
- [6] N. Liang, X. Ge, Y. Zhao, L. Xia, Z.-L. Song, R.-M. Kong, F. Qu, Promoting sensitive colorimetric detection of hydroquinone and Hg<sup>2+</sup> via ZIF-8 dispersion enhanced oxidase-mimicking activity of MnO<sub>2</sub> nanozyme, *J. Hazard. Mater.* 454 (2023) 131455-131455.
- [7] Z. Zhuang, C. Zhang, Z. Yu, W. Liu, Y. Zhong, J. Zhang, Z. Xu, Turn-on colorimetric detection of hydroquinone based on Au/CuO nanocomposite nanozyme, *Microchimica Acta* 189(8) (2022).
- [8] Y. He, M. Feng, X. Zhang, Y. Huang, Metal-organic framework (MOF)-derived flower-like Ni-MOF@NiV-layered double hydroxides as peroxidase mimetics for colorimetric detection of hydroquinone, *Anal. Chim. Acta* 1283 (2023).
